# Supplementary material for: Leveraging eQTLs to identify individual-level tissue of interest for a complex trait
Source: PubMed Central journal article supplement (PMC8174686; doi:10.1371/journal.pcbi.1008915), 2021-05-21
Supplement: pcbi.1008915.s001.pdf [file pcbi.1008915.s001.pdf]

## S1 Text: Markov Chain Monte Carlo (MCMC) algorithm for eGST

Our model for the phenotype of individual  $i$  is:

$$\begin{aligned} y_i &= \alpha_1 + \mathbf{x}'_{1i}\boldsymbol{\beta}_1 + \epsilon_{1i} \text{ if } C_i = 1 \\ &= \alpha_2 + \mathbf{x}'_{2i}\boldsymbol{\beta}_2 + \epsilon_{2i} \text{ if } C_i = 2 \end{aligned} \quad (6)$$

Here,  $\alpha_k$  is the baseline tissue-specific trait mean,  $\mathbf{x}_{ki}$  is the vector of normalized genotype values of individual  $i$  at the eQTL SNPs specific to tissue  $k$ ,  $\boldsymbol{\beta}_k = (\beta_{k1}, \beta_{k2} \dots, \beta_{km_k})$  are their effects on the trait under  $C_i = k$ , and  $\epsilon_{ki}$  is a noise term,  $i = 1, \dots, n$  and  $k = 1, 2$ . The random errors are distributed as:  $\epsilon_{1i} \sim N(0, \sigma_{\epsilon_1}^2)$  and  $\epsilon_{2i} \sim N(0, \sigma_{\epsilon_2}^2)$ .

Given that  $i = 1$ , we note that:  $V(\beta_{1j}) = \sigma_{x_1}^2$  and  $V(\mathbf{x}'_{11}\boldsymbol{\beta}_1) = m_1\sigma_{x_1}^2$ ;  $V(\beta_{2j}) = \sigma_{x_2}^2$  and  $V(\mathbf{x}'_{21}\boldsymbol{\beta}_2) = m_2\sigma_{x_2}^2$ . We define  $\tau_1$  and  $\tau_2$  such that:  $V(\mathbf{x}'_{11}\boldsymbol{\beta}_1) = \tau_1 V(\epsilon_{11}) = \tau_1\sigma_{\epsilon_1}^2$  and  $V(\mathbf{x}'_{21}\boldsymbol{\beta}_2) = \tau_2 V(\epsilon_{21}) = \tau_2\sigma_{\epsilon_2}^2$ . Thus, under  $C = 1$ , total variance of the trait is:  $V(\mathbf{x}'_{11}\boldsymbol{\beta}_1) + V(\epsilon_{11}) = m_1\sigma_{x_1}^2 + \sigma_{\epsilon_1}^2 = \tau_1\sigma_{\epsilon_1}^2 + \sigma_{\epsilon_1}^2 = (\tau_1 + 1)\sigma_{\epsilon_1}^2$ . Hence, when  $C = 1$ , the heritability of the trait is:  $\frac{\tau_1\sigma_{\epsilon_1}^2}{(\tau_1+1)\sigma_{\epsilon_1}^2} = \frac{\tau_1}{\tau_1+1}$ . So,  $k^{th}$  tissue-specific subtype heritability of the trait is  $\frac{\tau_k}{\tau_k+1}$ . Since, specifying  $\sigma_{\epsilon_k}^2$  and  $\tau_k$  determine  $\sigma_{x_k}^2 (= \frac{\tau_k\sigma_{\epsilon_k}^2}{m_k})$ , we place prior distributions on  $\sigma_{\epsilon_k}^2$  and  $\tau_k$  and update these parameters in the MCMC. From the MCMC sample of  $\tau_k$ , we can estimate the  $k^{th}$  tissue-specific subtype heritability of the trait. The prior distributions of the  $k^{th}$  tissue-specific set of parameters are given by: for  $k = 1, 2$ ,

$$\begin{aligned} \alpha_k &\sim N(0, \sigma_{\alpha}^2); \boldsymbol{\beta}_k \sim N(\mathbf{0}, \sigma_{x_k}^2 I_{m_k}); \sigma_{\epsilon_k}^2 \sim \text{Inverse-Gamma}(a_{\epsilon}, b_{\epsilon}); \\ \tau_k &\sim \text{Beta}(\psi, 1); P(C_i = k | w_1, w_2) = w_k; (w_1, w_2) \sim \text{Beta}(s_1, s_2). \end{aligned}$$

For ease in presentation of the MCMC algorithm, we define the following terms:

1.  $m_k$  = number of  $k^{th}$  tissue-specific eQTLs.
2.  $n_k = \#\{i : C_i = k\}$  = number of individuals assigned to  $k^{th}$  tissue-specific subtype.
3.  $\sigma_{\alpha_k}^2 = \frac{1}{\frac{n_k}{\sigma_{\epsilon_k}^2} + \frac{1}{\sigma_{\alpha}^2}}$ .
4.  $G_k$  is a  $(m_k \times n_k)$  matrix which is a sub-matrix of  $X_k$  of order  $(m_k \times n)$ , the columns of  $G_k$  are selected from the columns of  $X_k$  corresponding to the individuals such that  $C_i = k$ . Of note,  $G_k$  and  $X_k$  both have  $m_k$  rows.  $\mathbf{y}_k = \{y_i - \alpha_k : C_i = k\}$ , i.e., it is a sub-vector of  $(\mathbf{y} - \alpha_k)$  corresponding to the individuals such that  $C_i = k$ . So, the sub-vector has length  $n_k$ .

## MCMC algorithm for eGST

---

S1 Algorithm: MCMC algorithm based on Gibbs sampling to implement eGST

---

- 1: **Initialization:** First we run the MAP-EM algorithm for 15 iterations to obtain an initial values of the various parameters to be updated in each MCMC step. We initialize  $\sigma_{x_k}^2$ ,  $k = 1, 2$ , as the sample variance of  $\beta_k$  values obtained from the last iteration of the MAP-EM algorithm, and initialize  $\tau_k$  accordingly. Next, we update the different parameters in each MCMC step.
  - 2: **Loop:** For each  $k = 1, 2$ :
  - 3: Update  $\alpha_k$  which has the full conditional posterior distribution  $N(\mu_{\alpha_k}, \sigma_{\alpha_k}^2)$  with  $\mu_{\alpha_k} = \frac{\sigma_{\alpha_k}^2}{\sigma_{\epsilon_k}^2} \sum_{i:C_i=0} z_{ik}$ ; where  $z_{ik} = y_i - \mathbf{x}'_{ki} \beta_k$ .
  - 4: Update  $\beta_k$  from the following:  $N_{m_k}(\boldsymbol{\mu}_k, S_k)$ ,  $S_k = \left( \frac{1}{\sigma_{\epsilon_k}^2} G_k G_k' + \frac{1}{\sigma_{x_k}^2} I_{m_k} \right)^{-1}$ ,  $\boldsymbol{\mu}_k = \frac{1}{\sigma_{\epsilon_k}^2} S_k G_k \mathbf{y}_k$ .
  - 5: Separately update each  $C_i$ ,  $i = 1, \dots, n$ , with 1<sup>st</sup> tissue-specific posterior probability  $q_{i1} = \frac{1}{1 + \text{ratio}_{ik}}$ , where  $\text{ratio}_{ik} = \frac{w_2}{w_1} \frac{\sigma_{\epsilon_1}}{\sigma_{\epsilon_2}} \exp\left[\frac{1}{2}(\text{comp}_{i1} - \text{comp}_{i2})\right]$ , where  $\text{comp}_{i1} = \frac{1}{\sigma_{\epsilon_1}^2} (y_i - \alpha_1 - \mathbf{x}'_{1i} \beta_1)^2$  and  $\text{comp}_{i2} = \frac{1}{\sigma_{\epsilon_2}^2} (y_i - \alpha_2 - \mathbf{x}'_{2i} \beta_2)^2$ . We note that:  $q_{i2} = 1 - q_{i1}$ .
  - 6: Update  $w_1$  as:  $w_1 \sim \text{Beta}(n_1 + s_1, n_2 + s_2)$ . We note that:  $w_2 = 1 - w_1$ .
  - 7: Update  $\sigma_{\epsilon_k}^2$  from Inv-Gamma( $\frac{n_k}{2} + \frac{m_k}{2} + a_\epsilon, T_{1k} + T_{2k} + b_\epsilon$ ); where  $T_{1k} = \frac{1}{2} \sum_{i:C_i=k} (y_i - \alpha_k - \mathbf{x}'_{ki} \beta_k)^2$ , and  $T_{2k} = \frac{m_k \beta_k' \beta_k}{2\tau_k}$ ,  $k = 1, 2$ .
  - 8:  $\tau_k \sim \text{truncated Inv-Gamma}(\frac{m_k}{2} - \psi, CT_k)$ ,  $0 < \tau_k < 1$ ,  $CT_k = \frac{m_k}{2\sigma_{\epsilon_k}^2} \beta_k' \beta_k$
  - 9: Compute  $\sigma_{x_k}^2 = \frac{\tau_k \sigma_{\epsilon_k}^2}{m_k}$ , and  $k^{\text{th}}$  tissue-specific subtype heritability  $= \frac{\tau_k}{\tau_k + 1}$ .
  - 10: Go back to step 2 until all the MCMC iterations are completed.
-
