# Supplementary material for: Leveraging eQTLs to identify individual-level tissue of interest for a complex trait
Source: PubMed Central journal article supplement (PMC8174686; doi:10.1371/journal.pcbi.1008915), 2021-05-21
Supplement: pcbi.1008915.s006.pdf [file pcbi.1008915.s006.pdf]

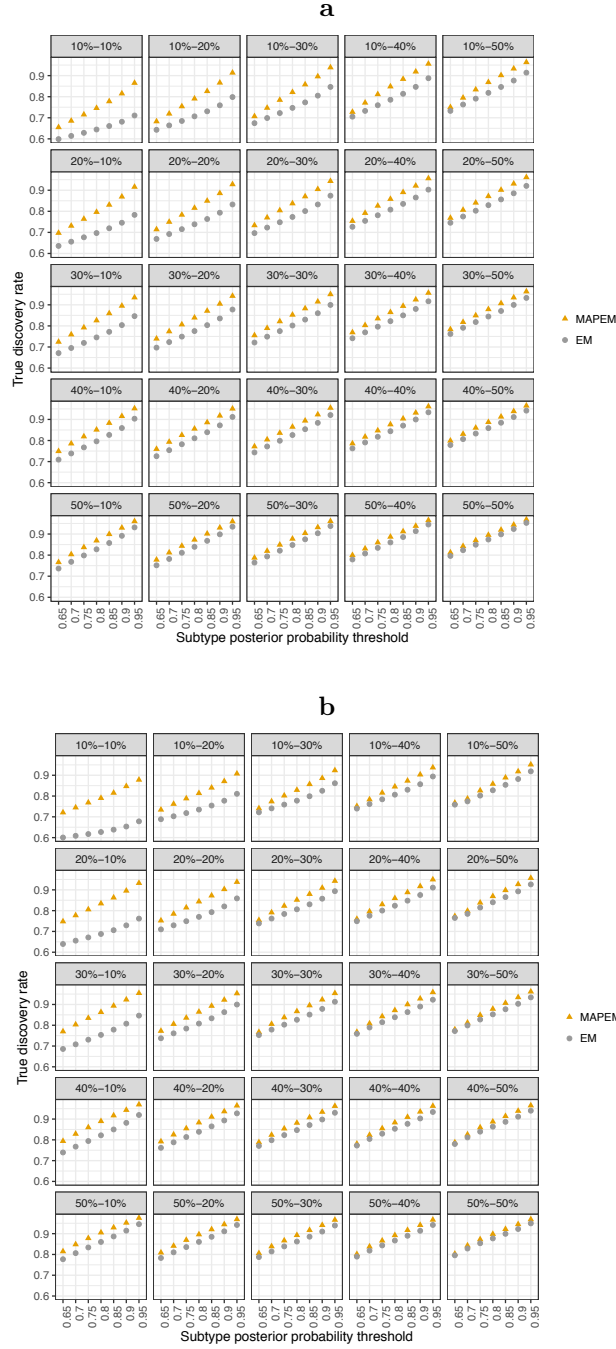

**S4 Fig:** Comparison between the true discovery rate (TDR) of classifying tissue-specific subtypes by the MAP-EM algorithm (under the Bayesian framework of the mixture model which eGST employs) versus the EM algorithm (under the frequentist framework of the mixture model) based on the threshold of tissue-specific subtype posterior probability as 65%, 70%, 75%, 80%, 85%, 90%, 95%, respectively. Box plots of TDR across 50 datasets simulated under  $m_1 = 1000$ ,  $m_2 = 1500$ , combinations of  $(h_1^2, h_2^2)$  with  $h_1^2 = 10\%, 20\%, 30\%, 40\%, 50\%$  and  $h_2^2 = 10\%, 20\%, 30\%, 40\%, 50\%$ ;  $n = 40000$ ; **(a)**  $w_1 = w_2 = \frac{1}{2}$  and **(b)**  $w_1 = \frac{1}{3}, w_2 = \frac{2}{3}$ , are presented. Here  $h_1^2$  and  $h_2^2$  are the heritabilities of tissue-specific subtypes of the trait due to  $m_1$  and  $m_2$  SNPs representing two sets of tissue-specific eQTL SNPs,  $w_1$  and  $w_2$  are the proportions of individuals in the sample assigned to two tissues,  $n$  is the total number of individuals.
