# Supplementary material for: Leveraging eQTLs to identify individual-level tissue of interest for a complex trait
Source: PubMed Central journal article supplement (PMC8174686; doi:10.1371/journal.pcbi.1008915), 2021-05-21
Supplement: pcbi.1008915.s008.pdf [file pcbi.1008915.s008.pdf]

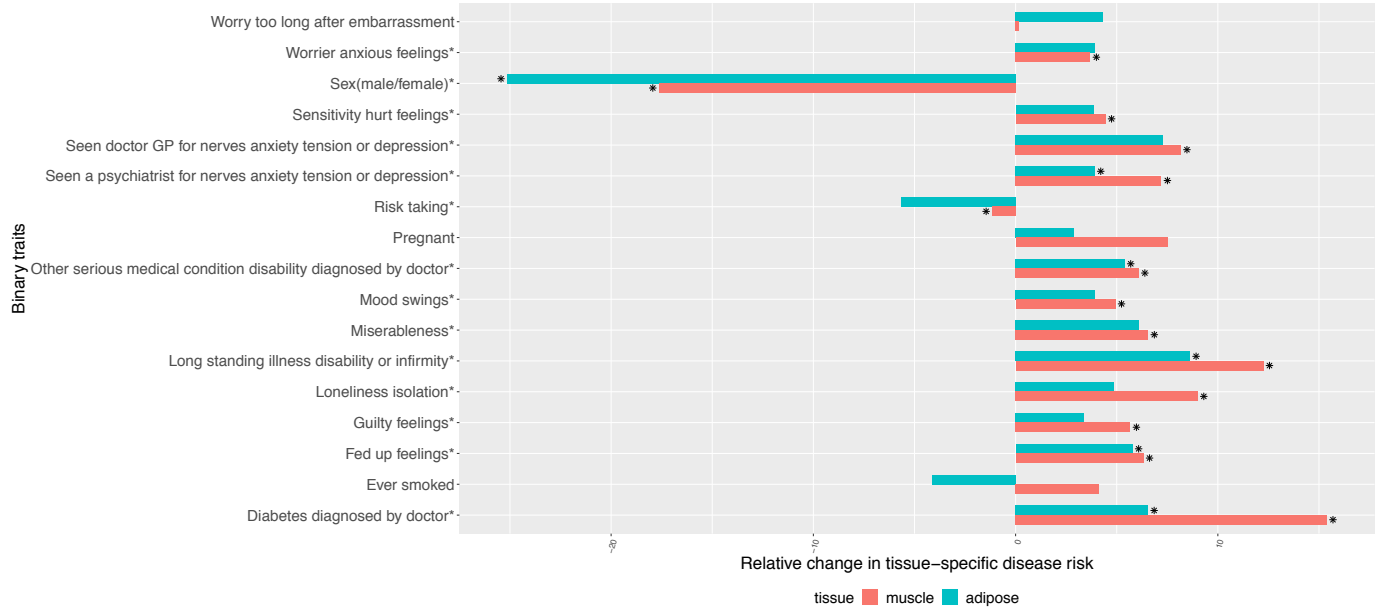

**S6 Fig:** Percentage of tissue-specific relative change in the risk of case-control traits between the individuals assigned to a tissue-specific subtype of WHRadjBMI and the population. The tissue-specific relative change of a disease risk is measured by:  $\frac{\text{tissue specific prevalence} - \text{population prevalence}}{\text{population s.d.}} \times 100$ . Tissue specific prevalence of the disorder was computed only in the individuals classified as the corresponding tissue-specific subtype of WHRadjBMI. The asterisk mark attached to the traits indicate which trait remains differentially distributed between at least one of adipose and muscle tissue-specific group of individuals and the remaining population after WHRadjBMI adjustment. For each trait the asterisk mark attached to the bars indicate which tissue-specific group of individuals remains significantly heterogeneous for the trait after WHRadjBMI adjustment.
