# Supplementary material for: Leveraging eQTLs to identify individual-level tissue of interest for a complex trait
Source: PubMed Central journal article supplement (PMC8174686; doi:10.1371/journal.pcbi.1008915), 2021-05-21
Supplement: pcbi.1008915.s009.pdf [file pcbi.1008915.s009.pdf]

| post prob cutoff | BMI (total #individuals: 336,106) |        | WHRadjBMI (total #individuals: 336,018) |                 |
|------------------|-----------------------------------|--------|-----------------------------------------|-----------------|
|                  | Adipose                           | Brain  | Adipose subcutaneous                    | Muscle skeletal |
| 65%              | 11,838                            | 13,354 | 11,803                                  | 7,238           |
| 70%              | 5,397                             | 6,465  | 5,319                                   | 2,787           |

**S1 Table:** Number of individuals classified by eGST as a tissue-specific subtype of BMI and WHRadjBMI based on tissue-specific posterior probability threshold of 65% and 70%.
