# Supplementary material for: Leveraging eQTLs to identify individual-level tissue of interest for a complex trait
Source: PubMed Central journal article supplement (PMC8174686; doi:10.1371/journal.pcbi.1008915), 2021-05-21
Supplement: pcbi.1008915.s010.pdf [file pcbi.1008915.s010.pdf]

| simulation scenario                                             | mean AUC     |               |
|-----------------------------------------------------------------|--------------|---------------|
|                                                                 | $n = 40,000$ | $n = 100,000$ |
| $w_1 = w_2 = 0.5, m_1 = m_2 = 1000, h_1^2 = 10\%, h_2^2 = 10\%$ | 0.59         | 0.60          |
| $w_1 = w_2 = 0.5, m_1 = m_2 = 1000, h_1^2 = 20\%, h_2^2 = 20\%$ | 0.65         | 0.66          |

**S2 Table:** Simulation results: effect of increasing sample size on classification accuracy of eGST.
