# Supplementary material for: Leveraging eQTLs to identify individual-level tissue of interest for a complex trait
Source: PubMed Central journal article supplement (PMC8174686; doi:10.1371/journal.pcbi.1008915), 2021-05-21
Supplement: pcbi.1008915.s011.pdf [file pcbi.1008915.s011.pdf]

| simulation scenario ( $n = 40,000$ )          | mean AUC                    |                             |
|-----------------------------------------------|-----------------------------|-----------------------------|
|                                               | $(m_1, m_2) = (1000, 1000)$ | $(m_1, m_2) = (1500, 1500)$ |
| $w_1 = w_2 = 0.5, h_1^2 = 10\%, h_2^2 = 10\%$ | 0.59                        | 0.58                        |
| $w_1 = w_2 = 0.5, h_1^2 = 20\%, h_2^2 = 20\%$ | 0.65                        | 0.64                        |

**S3 Table:** Simulation results: effect of increasing number of tissue-specific SNPs with fixed subtype heritability per tissue on classification accuracy of eGST.
