# Supplementary material for: Leveraging eQTLs to identify individual-level tissue of interest for a complex trait
Source: PubMed Central journal article supplement (PMC8174686; doi:10.1371/journal.pcbi.1008915), 2021-05-21
Supplement: pcbi.1008915.s012.pdf [file pcbi.1008915.s012.pdf]

| simulation scenario ( $n = 40,000$ )                            | AUC                       |                              |
|-----------------------------------------------------------------|---------------------------|------------------------------|
|                                                                 | $\alpha_1 = \alpha_2 = 0$ | $\alpha_1 = 0, \alpha_2 = 1$ |
| $w_1 = w_2 = 0.5, m_1 = m_2 = 1000, h_1^2 = 10\%, h_2^2 = 10\%$ | 0.6                       | 0.63                         |
| $w_1 = w_2 = 0.5, m_1 = m_2 = 1000, h_1^2 = 20\%, h_2^2 = 20\%$ | 0.64                      | 0.67                         |

**S4 Table:** Simulation results: effect of difference between baseline tissue-specific means of the phenotype ( $\alpha_1, \alpha_2$ ) on the classification accuracy of eGST.
