# Supplementary material for: Leveraging eQTLs to identify individual-level tissue of interest for a complex trait
Source: PubMed Central journal article supplement (PMC8174686; doi:10.1371/journal.pcbi.1008915), 2021-05-21
Supplement: pcbi.1008915.s013.pdf [file pcbi.1008915.s013.pdf]

| simulation scenario ( $n = 40,000$ )                            | AUC                                                                         |                                                                                     |
|-----------------------------------------------------------------|-----------------------------------------------------------------------------|-------------------------------------------------------------------------------------|
|                                                                 | $\overline{\mathbb{E}(\beta_{1j})} = \overline{\mathbb{E}(\beta_{2j})} = 0$ | $\overline{\mathbb{E}(\beta_{1j})} = -0.2, \overline{\mathbb{E}(\beta_{2j})} = 0.2$ |
| $w_1 = w_2 = 0.5, m_1 = m_2 = 1000, h_1^2 = 10\%, h_2^2 = 10\%$ | 0.6                                                                         | 0.63                                                                                |
| $w_1 = w_2 = 0.5, m_1 = m_2 = 1000, h_1^2 = 20\%, h_2^2 = 20\%$ | 0.64                                                                        | 0.68                                                                                |

**S5 Table:** Simulation results: effect of difference between the mean of tissue-specific genetic effect size distribution on the classification accuracy of eGST. Here  $j = 1, \dots, m_1$  for  $\beta_1$  (tissue 1) and  $j = 1, \dots, m_2$  for  $\beta_2$  (tissue 2).
