# Supplementary material for: Leveraging eQTLs to identify individual-level tissue of interest for a complex trait
Source: PubMed Central journal article supplement (PMC8174686; doi:10.1371/journal.pcbi.1008915), 2021-05-21
Supplement: pcbi.1008915.s014.pdf [file pcbi.1008915.s014.pdf]

| First tissue-specific subtype posterior probability |                                                     |                                                         |                                                     |
|-----------------------------------------------------|-----------------------------------------------------|---------------------------------------------------------|-----------------------------------------------------|
| Tissue-specific<br>subtype<br>heritability          | Group 1 with<br>effect from tissue 1<br>mean (s.d.) | Group 2 with<br>effect from both tissues<br>mean (s.d.) | Group 3 with<br>effect from tissue 2<br>mean (s.d.) |
| 10%, 10%                                            | 52% (0.4%)                                          | 50% (0.4%)                                              | 48% (0.5%)                                          |
| 20%, 20%                                            | 55% (0.7%)                                          | 50% (0.7%)                                              | 45% (0.7%)                                          |
| 30%, 30%                                            | 57% (0.7%)                                          | 50% (0.7%)                                              | 42% (0.7%)                                          |
| 40%, 40%                                            | 60% (0.8%)                                          | 50% (0.9%)                                              | 39% (0.8%)                                          |
| 50%, 50%                                            | 63% (0.9%)                                          | 50% (1%)                                                | 36% (0.9%)                                          |

**S6 Table:** Pattern of first tissue-specific subtype posterior probability when a group of individuals have genetic effect from both tissues. Group 1 comprising 10K individuals have genetic effect only due to the first tissue-specific set of SNPs. Group 2 comprising the next set of 10K individuals have effect due to both of the tissue-specific set of SNPs. Group 3 comprising 10K individuals have effect only due to the second tissue-specific set of SNPs. Total sample size is 30,000.
