# Supplementary material for: Leveraging eQTLs to identify individual-level tissue of interest for a complex trait
Source: PubMed Central journal article supplement (PMC8174686; doi:10.1371/journal.pcbi.1008915), 2021-05-21
Supplement: pcbi.1008915.s015.pdf [file pcbi.1008915.s015.pdf]

| 65% threshold of posterior probability |                                         |                                                 |                                        |
|----------------------------------------|-----------------------------------------|-------------------------------------------------|----------------------------------------|
| Heritability                           | Misclassified percentage<br>mean (s.d.) | Correctly classified<br>percentage, mean (s.d.) | Unclassified percentage<br>mean (s.d.) |
| 10%                                    | 3.4% (1.5%)                             | 50.2% (14%)                                     | 46.4% (12.9%)                          |
| 20%                                    | 1.4% (0.5%)                             | 88.9% (2.8%)                                    | 9.7% (2.4%)                            |
| 30%                                    | 0.9% (0.2%)                             | 94.6% (1%)                                      | 4.5% (0.9%)                            |
| 40%                                    | 1% (0.4%)                               | 95.4% (2.1%)                                    | 3.6% (1.7%)                            |
| 50%                                    | 1.4% (0.9%)                             | 94.2% (4.1%)                                    | 4.3% (3.2%)                            |
| 70% threshold of posterior probability |                                         |                                                 |                                        |
| Heritability                           | Misclassified percentage<br>mean (s.d.) | Correctly classified<br>percentage, mean (s.d.) | Unclassified percentage<br>mean (s.d.) |
| 10%                                    | 2.3% (1.1%)                             | 29.3% (7.4%)                                    | 68.3% (6.5%)                           |
| 20%                                    | 1% (0.3%)                               | 81.5% (5.1%)                                    | 17.5% (4.9%)                           |
| 30%                                    | 0.7% (0.1%)                             | 91.9% (1.7%)                                    | 7.4% (1.6%)                            |
| 40%                                    | 0.8% (0.3%)                             | 93.5% (3.4%)                                    | 5.8% (3.1%)                            |
| 50%                                    | 1.2% (0.7%)                             | 92.1% (5.6%)                                    | 6.7% (4.9%)                            |

**S7 Table:** Simulation results: Percentage of misclassification when one of the two tissues is completely irrelevant to the phenotype, i.e., the phenotype of all individuals have genetic effect only due to one tissue-specific set of SNPs. The misclassified percentage denotes the percentage of individuals classified to the irrelevant tissue. Here the first column provides the tissue-specific subtype heritability for the relevant tissue.
