# Supplementary material for: Leveraging eQTLs to identify individual-level tissue of interest for a complex trait
Source: PubMed Central journal article supplement (PMC8174686; doi:10.1371/journal.pcbi.1008915), 2021-05-21
Supplement: pcbi.1008915.s016.pdf [file pcbi.1008915.s016.pdf]

| BMI bins      | Number of individuals |       |            |       |
|---------------|-----------------------|-------|------------|-------|
|               | adipose               | brain | unassigned | total |
| 12.81 - 14.67 | 1                     | 6     | 2          | 9     |
| 14.67 - 16.52 | 30                    | 69    | 49         | 148   |
| 16.52 - 18.37 | 272                   | 441   | 577        | 1290  |
| 18.37 - 20.23 | 1146                  | 1974  | 4689       | 7809  |
| 20.23 - 22.08 | 2021                  | 3348  | 18551      | 23920 |
| 22.08 - 23.93 | 1157                  | 1903  | 41738      | 44798 |
| 23.93 - 25.79 | 124                   | 208   | 58906      | 59238 |
| 25.79 - 27.64 | 1                     | 4     | 59284      | 59289 |
| 27.64 - 29.49 | 61                    | 33    | 47808      | 47902 |
| 29.49 - 31.34 | 503                   | 314   | 33062      | 33879 |
| 31.34 - 33.2  | 1154                  | 719   | 19926      | 21799 |
| 33.2 - 35.05  | 1372                  | 973   | 11368      | 13713 |
| 35.05 - 36.9  | 1186                  | 877   | 6412       | 8475  |
| 36.9 - 38.76  | 899                   | 748   | 3670       | 5317  |
| 38.76 - 40.61 | 639                   | 551   | 2018       | 3208  |
| 40.61 - 42.46 | 454                   | 396   | 1214       | 2064  |
| 42.46 - 44.32 | 307                   | 270   | 694        | 1271  |
| 44.32 - 46.17 | 205                   | 173   | 392        | 770   |
| 46.17 - 48.02 | 107                   | 148   | 245        | 500   |
| 48.02 - 49.88 | 74                    | 83    | 141        | 298   |
| 49.88 - 51.73 | 40                    | 42    | 54         | 136   |
| 51.73 - 53.58 | 37                    | 27    | 44         | 108   |
| 53.58 - 55.44 | 13                    | 18    | 25         | 56    |
| 55.44 - 57.29 | 9                     | 12    | 20         | 41    |
| 57.29 - 59.14 | 12                    | 4     | 9          | 25    |
| 59.14 - 61    | 4                     | 6     | 4          | 14    |
| 61 - 62.85    | 6                     | 2     | 6          | 14    |
| 62.85 - 64.7  | 1                     | 2     | 1          | 4     |
| 64.7 - 66.56  | 1                     | 1     | 3          | 5     |
| 66.56 - 68.41 | 2                     | 0     | 0          | 2     |

**S8 Table:** Number of individuals in consecutive non-overlapping bins of BMI who were assigned to adipose and brain specific subtype of BMI, and the number of individuals that remained unassigned by eGST based on 65% threshold of tissue-specific posterior probability.
