# Supplementary material for: Leveraging eQTLs to identify individual-level tissue of interest for a complex trait
Source: PubMed Central journal article supplement (PMC8174686; doi:10.1371/journal.pcbi.1008915), 2021-05-21
Supplement: pcbi.1008915.s017.pdf [file pcbi.1008915.s017.pdf]

| WHRadjBMI bins | Number of individuals |        |            |       |
|----------------|-----------------------|--------|------------|-------|
|                | adipose               | muscle | unassigned | total |
| -0.44 - -0.4   | 3                     | 2      | 0          | 5     |
| -0.4 - -0.36   | 4                     | 2      | 2          | 8     |
| -0.36 - -0.32  | 18                    | 5      | 11         | 34    |
| -0.32 - -0.28  | 50                    | 14     | 28         | 92    |
| -0.28 - -0.24  | 116                   | 33     | 128        | 277   |
| -0.24 - -0.21  | 369                   | 107    | 473        | 949   |
| -0.21 - -0.17  | 1134                  | 301    | 2318       | 3753  |
| -0.17 - -0.13  | 2201                  | 660    | 10377      | 13238 |
| -0.13 - -0.09  | 1311                  | 410    | 29627      | 31348 |
| -0.09 - -0.05  | 524                   | 172    | 47369      | 48065 |
| -0.05 - -0.01  | 1265                  | 444    | 49017      | 50726 |
| -0.01 - 0.03   | 1257                  | 994    | 51773      | 54024 |
| 0.03 - 0.07    | 1077                  | 1169   | 56769      | 59015 |
| 0.07 - 0.11    | 712                   | 762    | 43180      | 44654 |
| 0.11 - 0.14    | 671                   | 948    | 19153      | 20772 |
| 0.14 - 0.18    | 647                   | 818    | 5285       | 6750  |
| 0.18 - 0.22    | 298                   | 289    | 1162       | 1749  |
| 0.22 - 0.26    | 102                   | 71     | 216        | 389   |
| 0.26 - 0.3     | 27                    | 24     | 66         | 117   |
| 0.3 - 0.34     | 11                    | 9      | 11         | 31    |
| 0.34 - 0.38    | 2                     | 3      | 4          | 9     |
| 0.38 - 0.42    | 1                     | 0      | 1          | 2     |
| 0.42 - 0.46    | 1                     | 0      | 0          | 1     |
| 0.46 - 0.49    | 0                     | 1      | 2          | 3     |
| 0.49 - 0.53    | 0                     | 0      | 1          | 1     |
| 0.53 - 0.57    | 0                     | 0      | 0          | 0     |
| 0.57 - 0.61    | 0                     | 0      | 1          | 1     |
| 0.61 - 0.65    | 0                     | 0      | 0          | 0     |
| 0.65 - 0.69    | 0                     | 0      | 0          | 0     |
| 0.69 - 0.73    | 1                     | 0      | 0          | 1     |

**S9 Table:** Number of individuals in consecutive non-overlapping bins of WHRadjBMI who were assigned to adipose and muscle specific subtype of WHRadjBMI, and the number of individuals that remained unassigned by eGST based on 65% threshold of tissue-specific posterior probability.
