# Supplementary material for: Leveraging eQTLs to identify individual-level tissue of interest for a complex trait
Source: PubMed Central journal article supplement (PMC8174686; doi:10.1371/journal.pcbi.1008915), 2021-05-21
Supplement: pcbi.1008915.s019.pdf [file pcbi.1008915.s019.pdf]

| Category                 | Trait                                         | AS P      | MS P      | Means   |         |         | signif tissue |
|--------------------------|-----------------------------------------------|-----------|-----------|---------|---------|---------|---------------|
|                          |                                               |           |           | AS      | MS      | popln   |               |
| Body size measure        | WHRadjBMI                                     | 0         | 2.37E-192 | -0.04   | 0.03    | 0.00    | both          |
| Body size measure        | WHR                                           | 3.68E-232 | 3.71E-201 | 0.85    | 0.91    | 0.87    | both          |
| Body size measures       | Body mass index                               | 6.76E-147 | 4.07E-42  | 29.19   | 28.41   | 27.39   | both          |
| Body size measures       | Standing height                               | 2.86E-124 | 1.38E-37  | 166.91  | 167.48  | 168.84  | both          |
| Body size measures       | Sitting height                                | 1.93E-70  | 1.18E-55  | 88.68   | 88.53   | 89.41   | both          |
| Body size measures       | Weight                                        | 1.13E-36  | 9.02E-07  | 81.27   | 79.83   | 78.31   | both          |
| Blood count              | Haemoglobin concentration                     | 2.27E-81  | 6.20E-11  | 14.01   | 14.12   | 14.21   | both          |
| Blood count              | Haematocrit percentage                        | 1.08E-59  | 1.03E-06  | 40.67   | 40.96   | 41.16   | both          |
| Blood count              | Red blood cell erythrocyte distribution width | 6.69E-40  | 3.06E-14  | 13.57   | 13.56   | 13.47   | both          |
| Blood count              | Red blood cell erythrocyte count              | 8.69E-38  | 4.27E-06  | 4.47    | 4.49    | 4.51    | both          |
| Blood count              | High light scatter reticulocyte percentage    | 5.46E-06  | 7.63E-31  | 0.41    | 0.43    | 0.40    | both          |
| Blood count              | White blood cell leukocyte count              | 3.41E-06  | 1.64E-28  | 6.99    | 7.12    | 6.89    | both          |
| Blood count              | Immature reticulocyte fraction                | 3.27E-17  | 1.74E-23  | 0.29    | 0.30    | 0.29    | both          |
| Blood count              | Neutrophil count                              | 1.01E-06  | 3.91E-22  | 4.32    | 4.41    | 4.24    | both          |
| Blood count              | Mean corpuscular haemoglobin concentration    | 1.44E-21  | 2.67E-08  | 34.47   | 34.47   | 34.54   | both          |
| Blood count              | Monocyte percentage                           | 2.51E-21  | 6.52E-10  | 6.94    | 6.98    | 7.10    | both          |
| Blood count              | Platelet crit                                 | 5.69E-18  | 1.54E-11  | 0.24    | 0.24    | 0.23    | both          |
| Blood count              | Lymphocyte count                              | 0.0003    | 1.30E-15  | 1.98    | 2.00    | 1.95    | both          |
| Blood count              | Platelet count                                | 8.60E-08  | 4.87E-08  | 256.00  | 257.00  | 253.21  | both          |
| Medications              | Number of treatments medications taken        | 9.24E-30  | 4.17E-50  | 2.77    | 2.97    | 2.45    | both          |
| Medical conditions       | Number of self reported non cancer illnesses  | 5.95E-26  | 1.19E-34  | 2.08    | 2.15    | 1.86    | both          |
| Baseline characteristics | Townsend deprivation index at recruitment     | 3.34E-10  | 8.09E-17  | -1.41   | -1.26   | -1.58   | both          |
| Mental health            | Neuroticism score                             | 1.72E-06  | 2.04E-08  | 4.24    | 4.35    | 4.10    | both          |
| Blood count              | Mean corpuscular haemoglobin                  | 1.64E-18  | 0.03      | 31.43   | 31.50   | 31.55   | adipose       |
| Blood count              | Monocyte count                                | 4.67E-08  | 0.04      | 0.47    | 0.49    | 0.48    | adipose       |
| Blood count              | Mean corpuscular volume                       | 9.40E-06  | 0.74      | 91.18   | 91.38   | 91.34   | adipose       |
| Blood count              | Mean platelet thrombocyte volume              | 9.74E-05  | 0.48      | 9.36    | 9.33    | 9.32    | adipose       |
| Blood count              | Eosinophil percentage                         | 0.0004    | 0.54      | 2.49    | 2.53    | 2.56    | adipose       |
| Urine assays             | Creatinine enzymatic in urine                 | 0.0001    | 0.02      | 8633.55 | 8618.76 | 8806.64 | adipose       |
| Body size measures       | Waist circumference                           | 0.20      | 3.17E-127 | 90.80   | 94.50   | 90.33   | muscle        |
| Blood count              | High light scatter reticulocyte count         | 0.01      | 2.98E-25  | 0.02    | 0.02    | 0.02    | muscle        |
| Blood count              | Reticulocyte percentage                       | 0.14      | 2.25E-23  | 1.36    | 1.42    | 1.35    | muscle        |
| Blood count              | Reticulocyte count                            | 0.22      | 2.65E-17  | 0.06    | 0.06    | 0.06    | muscle        |
| Blood count              | Basophil count                                | 0.27      | 4.63E-10  | 0.03    | 0.04    | 0.03    | muscle        |
| Medical conditions       | Non cancer illness code self reported         | 0.0007    | 1.21E-10  | 3071.24 | 2623.36 | 2891.68 | muscle        |
| Medical conditions       | Non cancer illness year age first occurred    | 0.06      | 4.69E-06  | 689.59  | 631.65  | 702.50  | muscle        |
| Education                | Age completed full time education             | 0.12      | 8.65E-06  | 16.36   | 16.25   | 16.45   | muscle        |

**S11 Table:** Quantitative traits among 106 phenotypes in UK Biobank which are differentially distributed between the adipose subcutaneous (AS) (and/or muscle skeletal (MS)) specific subtype group of individuals for WHRadjBMI and the remaining population. We provide the p-values of testing heterogeneity of each trait between each tissue-specific subtype group of individuals and the remaining population. For each trait, the tissue-specific (AS and MS) mean which is calculated only in the individuals classified as the corresponding tissue-specific subtype of WHRadjBMI are provided. We also provide the trait means computed in whole sample (popln). For each trait, we list the tissues for which the trait was differentially distributed between the corresponding tissue-specific subtype group of individuals and the remaining population (signif tissue).
