# Supplementary material for: Leveraging eQTLs to identify individual-level tissue of interest for a complex trait
Source: PubMed Central journal article supplement (PMC8174686; doi:10.1371/journal.pcbi.1008915), 2021-05-21
Supplement: pcbi.1008915.s020.pdf [file pcbi.1008915.s020.pdf]

| Trait                                                              | P adipose |           | P brain   |           | Risk    |       |       | signif tissue |         |
|--------------------------------------------------------------------|-----------|-----------|-----------|-----------|---------|-------|-------|---------------|---------|
|                                                                    | primary   | BMIadj    | primary   | BMIadj    | adipose | brain | popln | primary       | BMIadj  |
| *Sex(male/female)                                                  | 1.20E-83  | 3.06E-143 | 8.31E-129 | 3.95E-135 | 0.38    | 0.36  | 0.46  | both          | both    |
| *Diabetes diagnosed by doctor                                      | 3.38E-90  | 0.0004    | 2.73E-30  | 0.003     | 0.09    | 0.07  | 0.05  | both          | adipose |
| *Long standing illness<br>disability or infirmity                  | 4.77E-82  | 1.89E-07  | 1.80E-27  | 2.54E-16  | 0.41    | 0.37  | 0.32  | both          | both    |
| *Fed up feelings                                                   | 3.04E-41  | 9.07E-13  | 2.61E-08  | 1.32E-06  | 0.47    | 0.43  | 0.41  | both          | both    |
| *Loneliness isolation                                              | 1.37E-38  | 8.82E-16  | 5.88E-20  | 6.80E-16  | 0.22    | 0.21  | 0.18  | both          | both    |
| *Other serious medical condition<br>disability diagnosed by doctor | 2.32E-26  | 3.17E-05  | 3.54E-13  | 3.33E-09  | 0.24    | 0.23  | 0.20  | both          | both    |
| *Miserableness                                                     | 5.70E-30  | 8.05E-17  | 5.03E-09  | 2.28E-08  | 0.48    | 0.45  | 0.43  | both          | both    |
| *Tense highly strung                                               | 1.14E-05  | 9.67E-12  | 2.09E-23  | 9.45E-23  | 0.19    | 0.20  | 0.17  | both          | both    |
| *Mood swings                                                       | 2.17E-24  | 3.13E-09  | 6.58E-06  | 3.06E-05  | 0.50    | 0.47  | 0.45  | both          | both    |
| *Seen doctor GP for nerves<br>anxiety tension or depression        | 2.20E-23  | 4.56E-12  | 2.31E-12  | 2.42E-11  | 0.39    | 0.37  | 0.34  | both          | both    |
| *Snoring                                                           | 8.37E-06  | 1.03E-28  | 6.78E-16  | 8.28E-29  | 0.40    | 0.34  | 0.37  | both          | both    |
| *Seen a psychiatrist for nerves<br>anxiety tension or depression   | 4.27E-18  | 3.24E-09  | 1.21E-10  | 3.83E-09  | 0.14    | 0.13  | 0.11  | both          | both    |
| *Worrier anxious feelings                                          | 2.80E-07  | 1.55E-20  | 4.45E-16  | 1.18E-17  | 0.59    | 0.60  | 0.57  | both          | both    |
| *Sensitivity hurt feelings                                         | 2.70E-13  | 5.29E-15  | 4.55E-10  | 3.47E-10  | 0.59    | 0.58  | 0.56  | both          | both    |
| *Guilty feelings                                                   | 2.90E-13  | 2.27E-15  | 1.93E-08  | 1.50E-08  | 0.31    | 0.30  | 0.28  | both          | both    |
| *Suffer from nerves                                                | 4.25E-05  | 1.15E-07  | 1.90E-05  | 1.57E-05  | 0.23    | 0.23  | 0.21  | both          | both    |
| *Nervous feelings                                                  | 0.001     | 4.55E-16  | 2.01E-22  | 1.93E-19  | 0.25    | 0.27  | 0.24  | brain         | both    |
| *Risk taking                                                       | 0.018     | 3.59E-08  | 9.94E-11  | 4.25E-12  | 0.24    | 0.23  | 0.25  | brain         | both    |
| *Worry too long after embarrassment                                | 0.001     | 4.08E-11  | 8.40E-06  | 2.72E-06  | 0.49    | 0.50  | 0.48  | brain         | both    |

**S12 Table:** Case-control traits among 106 phenotypes considered in the UK biobank which are differentially distributed between the adipose (and/or brain) specific subtype group of individuals for BMI and the remaining population. For each trait, we provide the p-value of testing heterogeneity between each tissue-specific subtype group of individuals and the remaining population before (primary) and after BMI adjustment (BMIadj). For each trait, tissue-specific groups which appear to be significantly heterogeneous (signif tissue) before (primary) and after BMI adjustment (BMIadj) are provided. The asterisk mark attached to the traits indicate which trait remains differentially distributed between at least one of the tissue-specific groups and the remaining population after BMI adjustment. Tissue-specific risk of the disorders along with population-level risk are also provided.
