# Supplementary material for: Leveraging eQTLs to identify individual-level tissue of interest for a complex trait
Source: PubMed Central journal article supplement (PMC8174686; doi:10.1371/journal.pcbi.1008915), 2021-05-21
Supplement: pcbi.1008915.s021.pdf [file pcbi.1008915.s021.pdf]

| Trait                                                              | P AS      |          | P MS     |          | Risk  |       |        | signif tissue |          |
|--------------------------------------------------------------------|-----------|----------|----------|----------|-------|-------|--------|---------------|----------|
|                                                                    | primary   | adjusted | primary  | adjusted | AS    | MS    | popln  | primary       | adjusted |
| *Sex(male/female)                                                  | 4.37E-170 | 1.14E-08 | 6.69E-52 | 0        | 0.34  | 0.37  | 0.46   | both          | both     |
| *Diabetes diagnosed by doctor                                      | 5.42E-13  | 2.68E-22 | 8.91E-40 | 4.26E-11 | 0.06  | 0.08  | 0.05   | both          | both     |
| *Long standing illness<br>disability or infirmity                  | 4.69E-21  | 3.51E-50 | 2.92E-25 | 6.61E-12 | 0.36  | 0.38  | 0.32   | both          | both     |
| *Seen doctor GP for nerves<br>anxiety tension or depression        | 8.80E-16  | 0.01     | 2.73E-12 | 5.68E-22 | 0.38  | 0.38  | 0.34   | both          | muscle   |
| *Loneliness isolation                                              | 1.02E-07  | 0.002    | 1.81E-14 | 2.61E-18 | 0.20  | 0.21  | 0.18   | both          | muscle   |
| *Miserableness                                                     | 2.54E-11  | 0.09     | 2.37E-08 | 3.04E-16 | 0.46  | 0.46  | 0.43   | both          | muscle   |
| *Fed up feelings                                                   | 2.59E-10  | 1.90E-07 | 8.04E-08 | 2.24E-09 | 0.43  | 0.44  | 0.41   | both          | both     |
| *Other serious medical condition<br>disability diagnosed by doctor | 3.83E-09  | 2.61E-16 | 2.36E-07 | 0.0002   | 0.23  | 0.23  | 0.20   | both          | both     |
| *Seen a psychiatrist for nerves<br>anxiety tension or depression   | 1.70E-05  | 6.28E-06 | 6.95E-10 | 1.21E-09 | 0.13  | 0.14  | 0.11   | both          | both     |
| Ever smoked                                                        | 4.74E-06  | 0.004    | 0.0004   | 0.88     | 0.58  | 0.62  | 0.60   | both          | none     |
| *Guilty feelings                                                   | 0.0002    | 0.05     | 1.57E-06 | 5.14E-13 | 0.30  | 0.31  | 0.28   | both          | muscle   |
| *Sensitivity hurt feelings                                         | 2.69E-05  | 0.02     | 0.0002   | 2.37E-14 | 0.58  | 0.58  | 0.56   | both          | muscle   |
| *Mood swings                                                       | 2.01E-05  | 0.002    | 2.90E-05 | 1.65E-06 | 0.47  | 0.48  | 0.45   | both          | muscle   |
| *Risk taking                                                       | 8.17E-10  | 0.30     | 0.34     | 1.90E-07 | 0.23  | 0.25  | 0.25   | adipose       | muscle   |
| Worry too long<br>after embarrassment                              | 3.26E-06  | 0.48     | 0.89     | 0.003    | 0.50  | 0.48  | 0.48   | adipose       | none     |
| *Worrier anxious feelings                                          | 1.94E-05  | 0.38     | 0.002    | 7.28E-10 | 0.59  | 0.59  | 0.57   | adipose       | muscle   |
| Pregnant                                                           | 0.02      | 0.13     | 2.43E-06 | 0.01     | 0.001 | 0.002 | 0.0004 | muscle        | none     |

**S13 Table:** Case-control traits among 106 phenotypes considered in the UK biobank which are differentially distributed between the adipose subcutaneous (AS) (and/or muscle skeletal (MS)) specific subtype group of individuals for WHRadjBMI and the remaining population. For each trait, we provide the p-value of testing heterogeneity between each tissue-specific subtype group of individuals and the remaining population before (primary) and after WHRadjBMI adjustment (adjusted). For each trait, tissue-specific groups which appear to be significantly heterogeneous (signif tissue) before (primary) and after WHRadjBMI adjustment (adjusted) are provided. The asterisk mark attached to the traits indicate which trait remains differentially distributed between at least one of the tissue-specific groups and the remaining population after WHRadjBMI adjustment. Tissue-specific risk of the disorders along with population-level risk are also provided.
