# Supplementary material for: Leveraging eQTLs to identify individual-level tissue of interest for a complex trait
Source: PubMed Central journal article supplement (PMC8174686; doi:10.1371/journal.pcbi.1008915), 2021-05-21
Supplement: pcbi.1008915.s022.pdf [file pcbi.1008915.s022.pdf]

| Trait                                                                                   | P AS     |          | P MS     |          | signif tissue |          | #categ |
|-----------------------------------------------------------------------------------------|----------|----------|----------|----------|---------------|----------|--------|
|                                                                                         | primary  | adjusted | primary  | adjusted | primary       | adjusted |        |
| *Alcohol intake frequency                                                               | 8.90E-74 | 1.41E-07 | 3.66E-24 | 6.98E-11 | both          | both     | 6      |
| *Overall health rating                                                                  | 2.35E-46 | 2.11E-23 | 6.34E-49 | 3.35E-11 | both          | both     | 4      |
| *Weight change compared with 1 year ago                                                 | 8.51E-37 | 6.67E-19 | 2.89E-17 | 5.46E-27 | both          | both     | 3      |
| *Alcohol drinker status                                                                 | 2.93E-23 | 4.56E-14 | 7.33E-06 | 9.74E-09 | both          | both     | 3      |
| *Falls in the last year                                                                 | 1.43E-23 | 4.22E-12 | 4.68E-14 | 1.95E-10 | both          | both     | 3      |
| Frequency of tiredness lethargy in last weeks                                           | 3.69E-22 | 0.002    | 3.00E-17 | 0.12     | both          | none     | 4      |
| *Current tobacco smoking                                                                | 0.0004   | 0.35     | 9.55E-19 | 4.74E-05 | both          | muscle   | 3      |
| Qualifications                                                                          | 0.0002   | 0.1      | 5.74E-17 | 1        | both          | none     | 7      |
| *Smoking status                                                                         | 1.46E-05 | 0.35     | 1.29E-16 | 4.50E-05 | both          | muscle   | 3      |
| *Sleeplessness insomnia                                                                 | 7.08E-13 | 0.02     | 1.02E-09 | 3.51E-10 | both          | muscle   | 3      |
| *Frequency of depressed mood in last 2 weeks                                            | 2.94E-08 | 0.0002   | 2.60E-05 | 0.009    | both          | adipose  | 4      |
| *Blood clot DVT bronchitis emphysema asthma rhinitis eczema allergy diagnosed by doctor | 3.07E-06 | 0.07     | 1.12E-10 | 1.57E-06 | both          | muscle   | 6      |
| *Getting up in morning                                                                  | 2.40E-06 | 0.0002   | 2.97E-11 | 0.54     | both          | adipose  | 4      |
| *Frequency of unenthusiasm disinterest in last 2 weeks                                  | 2.23E-05 | 2.54E-05 | 5.29E-07 | 0.0009   | both          | adipose  | 4      |
| Daytime dozing sleeping narcolepsy                                                      | 3.88E-06 | 0.16     | 0.0003   | 0.46     | both          | none     | 4      |
| Illness injury bereavement stress in last 2 years                                       | 1.55E-09 | 0.06     | 0.003    | 0.42     | adipose       | none     | 7      |
| Past tobacco smoking                                                                    | 8.52E-06 | 0.02     | 0.004    | 0.24     | adipose       | none     | 4      |
| *Nap during day                                                                         | 0.12     | 1.77E-18 | 2.65E-10 | 0.14     | muscle        | adipose  | 3      |
| Frequency of tenseness restlessness in last 2 weeks                                     | 0.02     | 0.01     | 3.04E-06 | 0.05     | muscle        | none     | 4      |
| Morning evening person chronotype                                                       | 0.001    | 0.03     | 0.0001   | 0.43     | muscle        | none     | 4      |

**S14 Table:** Qualitative/categorical traits with three or more categories that are differentially distributed between at least one of adipose subcutaneous (AS) and muscle skeletal (MS) specific subtype groups of individuals for WHRadjBMI and the remaining population. For each trait we provide the p-values of testing heterogeneity between each tissue-specific subtype group of individuals and the remaining population before (primary) and after WHRadjBMI adjustment (adjusted). For each trait, tissue-specific groups which appear to be significantly heterogeneous (signif tissue) before (primary) and after WHRadjBMI adjustment (adjusted) are also provided. The asterisk mark attached to the traits indicate which trait remains differentially distributed between at least one of the tissue-specific groups and the remaining population after WHRadjBMI adjustment. The number of categories for each trait (#categ) are also listed.
