# Supplementary material for: Leveraging eQTLs to identify individual-level tissue of interest for a complex trait
Source: PubMed Central journal article supplement (PMC8174686; doi:10.1371/journal.pcbi.1008915), 2021-05-21
Supplement: pcbi.1008915.s023.pdf [file pcbi.1008915.s023.pdf]

| Trait                                                                   | adipose P | brain P   | signif tissue | Tissue-specific relative change |                 |              |               |
|-------------------------------------------------------------------------|-----------|-----------|---------------|---------------------------------|-----------------|--------------|---------------|
|                                                                         |           |           |               | adipose BMIadj                  | adipose primary | brain BMIadj | brain primary |
| Non cancer illness code self reported                                   | 0         | 3.37E-06  | both          | -1.46                           | -3.95           | -0.26        | -0.92         |
| Interpolated Age of participant when non cancer illness first diagnosed | 3.05E-22  | 4.31E-14  | both          | -7.14                           | -2.43           | -5.53        | -4.28         |
| Number of self reported non cancer illnesses                            | 3.01E-13  | 1.60E-21  | both          | 7.22                            | 21.14           | 5.87         | 6.71          |
| Haemoglobin concentration                                               | 8.50E-118 | 4.50E-125 | both          | -22.72                          | -14.19          | -20.99       | -20.23        |
| Red blood cell erythrocyte count                                        | 2.98E-93  | 8.65E-108 | both          | -19.83                          | -7.54           | -19.81       | -18.61        |
| Haematocrit percentage                                                  | 1.52E-94  | 1.57E-102 | both          | -20.01                          | -11.54          | -18.92       | -18.18        |
| Reticulocyte count                                                      | 1.70E-31  | 1.24E-42  | both          | -7.00                           | 8.54            | -6.46        | -5.06         |
| Mean sphered cell volume                                                | 3.28E-16  | 2.44E-27  | both          | 8.84                            | -0.23           | 10.69        | 9.89          |
| Red blood cell erythrocyte distribution width                           | 1.17E-22  | 3.01E-25  | both          | 11.49                           | 16.74           | 9.86         | 10.18         |
| Mean corpuscular haemoglobin concentration                              | 1.39E-23  | 5.61E-15  | both          | -8.11                           | -7.86           | -5.97        | -5.94         |
| Reticulocyte percentage                                                 | 5.39E-15  | 1.46E-23  | both          | -4.37                           | 8.85            | -4.00        | -2.90         |
| Monocyte percentage                                                     | 1.31E-15  | 2.68E-13  | both          | -4.55                           | -4.09           | -5.25        | -5.23         |
| Neutrophil percentage                                                   | 4.68E-13  | 3.96E-12  | both          | 6.72                            | 6.58            | 6.62         | 6.61          |
| High light scatter reticulocyte count                                   | 1.16E-10  | 3.16E-08  | both          | -5.96                           | 19.22           | -5.62        | -3.31         |
| Neutrophil count                                                        | 2.40E-08  | 2.43E-10  | both          | 6.02                            | 15.43           | 7.03         | 7.61          |
| Basophil percentage                                                     | 1.31E-09  | 6.19E-05  | both          | 5.06                            | 4.48            | 4.85         | 4.77          |
| Mean reticulocyte volume                                                | 6.71E-06  | 4.40E-09  | both          | 4.74                            | 2.28            | 5.38         | 5.18          |
| Lymphocyte percentage                                                   | 3.06E-08  | 2.12E-08  | both          | -5.54                           | -6.01           | -5.40        | -5.43         |
| Platelet crit                                                           | 2.29E-08  | 7.27E-07  | both          | 5.83                            | 8.44            | 4.31         | 4.50          |
| Eosinophil percentage                                                   | 5.59E-05  | 5.25E-08  | both          | -3.43                           | -1.46           | -2.49        | -2.35         |
| Platelet count                                                          | 1.22E-05  | 2.66E-05  | both          | 4.78                            | 6.48            | 4.01         | 4.13          |
| Waist circumference                                                     | 6.43E-106 | 1.15E-118 | both          | -22.89                          | 39.90           | -21.34       | -8.71         |
| Weight                                                                  | 7.13E-71  | 1.60E-66  | both          | -17.15                          | 45.05           | -15.66       | -4.81         |
| Standing height                                                         | 6.79E-58  | 6.24E-63  | both          | -14.74                          | -15.57          | -13.37       | -13.43        |
| Sitting height                                                          | 2.15E-46  | 8.76E-48  | both          | -13.52                          | -9.42           | -13.10       | -12.79        |
| Number of treatments medications taken                                  | 6.14E-17  | 9.61E-38  | both          | 9.72                            | 24.52           | 8.89         | 9.68          |
| Neuroticism score                                                       | 6.29E-14  | 4.23E-31  | both          | 10.52                           | 10.86           | 9.01         | 9.02          |
| Townsend deprivation index at recruitment                               | 7.86E-20  | 7.03E-29  | both          | 9.85                            | 15.63           | 11.01        | 11.34         |
| Creatinine enzymatic in urine                                           | 1.36E-20  | 1.07E-13  | both          | -8.62                           | 4.89            | -7.73        | -6.85         |
| Potassium in urine                                                      | 3.55E-10  | 1.11E-11  | both          | -6.64                           | 0.42            | -5.90        | -5.49         |
| Birth weight                                                            | 3.63E-07  | 5.43E-05  | both          | -5.99                           | -3.70           | -4.81        | -4.65         |
| Non cancer illness year age first occurred                              | 1.67E-90  | 0.25      | adipose       | 2.31                            | -8.27           | 2.97         | 0.15          |
| Monocyte count                                                          | 1.82E-07  | 0.003     | adipose       | -2.23                           | 5.21            | -2.95        | -2.42         |
| Eosinophil count                                                        | 3.15E-05  | 0.18      | adipose       | -2.45                           | 3.56            | -0.87        | -0.44         |
| High light scatter reticulocyte percentage                              | 6.41E-05  | 0.003     | adipose       | -2.51                           | 12.78           | -2.19        | -1.00         |
| Sodium in urine                                                         | 1.45E-08  | 0.0005    | adipose       | -5.73                           | 7.97            | -4.45        | -3.55         |
| Basophil count                                                          | 0.004     | 1.61E-22  | brain         | 5.34                            | 7.50            | 5.18         | 5.30          |
| Platelet distribution width                                             | 0.002     | 2.59E-06  | brain         | -2.92                           | 0.44            | -4.49        | -4.24         |
| Mean corpuscular volume                                                 | 0.07      | 4.19E-06  | brain         | 1.93                            | -5.86           | 4.09         | 3.49          |
| White blood cell leukocyte count                                        | 0.001     | 1.56E-05  | brain         | 2.67                            | 13.43           | 3.95         | 4.67          |
| Sleep duration                                                          | 0.01      | 1.55E-54  | brain         | -2.33                           | -4.26           | -4.08        | -4.20         |

**S15 Table:** Heterogeneity of non-BMI quantitative traits between the adipose (brain) specific subtype group of individuals for BMI and the remaining population after BMI adjustment of the traits in the population using linear regression. For each trait, we provide the p-values of testing heterogeneity between each tissue-specific subtype group of individuals and the remaining population after BMI adjustment. For each trait, tissue-specific groups which appear to be significantly heterogeneous (signif tissue) after BMI adjustment are provided. To measure the primary tissue-specific relative change of a trait we calculate the following:  $\frac{\text{tissue specific mean} - \text{remaining population mean}}{\text{population s.d.}} \times 100$ , where the tissue-specific mean is computed only in the individuals with the corresponding tissue-specific subtype of BMI. The same measure is calculated for a trait residual obtained after adjusting for BMI in the population to quantify the tissue-specific relative change of the trait after BMI adjustment (BMIadj).
