# Supplementary material for: Leveraging eQTLs to identify individual-level tissue of interest for a complex trait
Source: PubMed Central journal article supplement (PMC8174686; doi:10.1371/journal.pcbi.1008915), 2021-05-21
Supplement: pcbi.1008915.s025.pdf [file pcbi.1008915.s025.pdf]

| Trait                                                                   | BMI matched adip change |      | adip change | BMI matched brain change |      | brain change |
|-------------------------------------------------------------------------|-------------------------|------|-------------|--------------------------|------|--------------|
|                                                                         | mean                    | sd   | primary     | mean                     | sd   | primary      |
| Haemoglobin concentration                                               | 0.78                    | 0.58 | 14.19       | 3.50                     | 0.77 | 20.23        |
| Mean sphered cell volume                                                | 1.68                    | 0.87 | 0.23        | 2.44                     | 0.79 | 9.89         |
| Mean reticulocyte volume                                                | 1.93                    | 0.89 | 2.28        | 2.04                     | 0.79 | 5.18         |
| Number of self reported non cancer illnesses                            | 2.91                    | 0.92 | 21.14       | 0.90                     | 0.64 | 6.71         |
| Mean corpuscular volume                                                 | 1.05                    | 0.72 | 5.86        | 2.69                     | 0.83 | 3.49         |
| Interpolated Age of participant when non cancer illness first diagnosed | 0.81                    | 0.57 | 2.43        | 2.89                     | 0.92 | 4.28         |
| Haematocrit percentage                                                  | 0.71                    | 0.53 | 11.54       | 2.83                     | 0.78 | 18.18        |
| Standing height                                                         | 0.72                    | 0.52 | 15.57       | 2.74                     | 0.74 | 13.43        |
| Number of treatments medications taken                                  | 2.60                    | 0.92 | 24.52       | 0.81                     | 0.60 | 9.68         |
| Mean corpuscular haemoglobin concentration                              | 0.87                    | 0.68 | 7.86        | 2.49                     | 0.82 | 5.94         |
| Red blood cell erythrocyte distribution width                           | 2.31                    | 0.92 | 16.74       | 0.91                     | 0.66 | 10.18        |
| Neuroticism score                                                       | 1.73                    | 0.89 | 10.86       | 1.24                     | 0.74 | 9.02         |
| Non cancer illness year age first occurred                              | 1.44                    | 0.79 | 8.27        | 1.39                     | 0.80 | 0.15         |
| Non cancer illness code self reported                                   | 1.69                    | 0.85 | 3.95        | 0.91                     | 0.64 | 0.92         |
| Red blood cell erythrocyte count                                        | 0.86                    | 0.61 | 7.54        | 1.43                     | 0.74 | 18.61        |
| Birth weight                                                            | 1.43                    | 0.95 | 3.70        | 0.84                     | 0.62 | 4.65         |
| Lymphocyte percentage                                                   | 1.38                    | 0.82 | 6.01        | 0.82                     | 0.58 | 5.43         |
| Potassium in urine                                                      | 0.71                    | 0.53 | 0.42        | 1.45                     | 0.78 | 5.49         |
| Sleep duration                                                          | 0.75                    | 0.58 | 4.26        | 1.39                     | 0.75 | 4.20         |
| Eosinophill count                                                       | 0.89                    | 0.68 | 3.56        | 1.22                     | 0.76 | 0.44         |
| Platelet crit                                                           | 1.10                    | 0.75 | 8.44        | 1.00                     | 0.68 | 4.50         |
| Neutrophill count                                                       | 0.98                    | 0.72 | 15.43       | 1.10                     | 0.73 | 7.61         |
| Sitting height                                                          | 0.86                    | 0.63 | 9.42        | 1.10                     | 0.67 | 12.79        |
| Waist circumference                                                     | 0.49                    | 0.35 | 39.90       | 1.46                     | 0.49 | 8.71         |
| Eosinophill percentage                                                  | 0.72                    | 0.55 | 1.46        | 1.19                     | 0.74 | 2.35         |
| High light scatter reticulocyte percentage                              | 1.10                    | 1.06 | 12.78       | 0.76                     | 0.72 | 1.00         |
| Sodium in urine                                                         | 0.79                    | 0.58 | 7.97        | 1.06                     | 0.66 | 3.55         |
| Reticulocyte count                                                      | 0.73                    | 0.55 | 8.54        | 1.09                     | 0.63 | 5.06         |
| Monocyte count                                                          | 1.03                    | 0.71 | 5.21        | 0.77                     | 0.57 | 2.42         |
| Neutrophill percentage                                                  | 1.07                    | 0.75 | 6.58        | 0.70                     | 0.51 | 6.61         |
| Platelet count                                                          | 1.04                    | 0.71 | 6.48        | 0.70                     | 0.52 | 4.13         |
| Creatinine enzymatic in urine                                           | 0.91                    | 0.68 | 4.89        | 0.84                     | 0.60 | 6.85         |
| Monocyte percentage                                                     | 0.97                    | 0.70 | 4.09        | 0.76                     | 0.55 | 5.23         |
| Platelet distribution width                                             | 0.95                    | 0.66 | 0.44        | 0.75                     | 0.54 | 4.24         |
| Reticulocyte percentage                                                 | 0.80                    | 0.61 | 8.85        | 0.85                     | 0.57 | 2.90         |
| Basophill count                                                         | 0.83                    | 0.64 | 7.50        | 0.82                     | 0.60 | 5.30         |
| Basophill percentage                                                    | 0.84                    | 0.65 | 4.48        | 0.79                     | 0.59 | 4.77         |
| Townsend deprivation index at recruitment                               | 0.95                    | 0.67 | 15.63       | 0.67                     | 0.52 | 11.34        |
| Weight                                                                  | 1.23                    | 0.54 | 45.05       | 0.37                     | 0.28 | 4.81         |
| White blood cell leukocyte count                                        | 0.69                    | 0.52 | 13.43       | 0.81                     | 0.61 | 4.67         |
| High light scatter reticulocyte count                                   | 0.81                    | 0.61 | 19.22       | 0.62                     | 0.48 | 3.31         |

**S17 Table:** Magnitude of relative change of non-BMI quantitative traits between a tissue-specific subtype group of individuals for BMI and the corresponding group of BMI-matched individuals randomly selected from the population. The magnitude of BMI-matched tissue-specific relative change of a trait is calculated as the following:  $\left| \frac{\text{tissue specific mean} - \text{BMI matched random mean}}{\text{population s.d.}} \right| \times 100$ , where BMI-matched random mean is the trait mean computed only in the BMI-matched (with the individuals belonging to the corresponding tissue-specific subtype group of BMI) random individuals selected from the population. The tissue-specific mean is computed only in the individuals with the corresponding tissue-specific subtype of BMI. We also provide the magnitude of primary tissue-specific relative change (before BMI-matching) of each trait which is measured by:  $\left| \frac{\text{tissue specific mean} - \text{remaining population mean}}{\text{population s.d.}} \right| \times 100$ . These traits were found to be differentially distributed between at least one of adipose and brain specific group of individuals and the remaining population after BMI adjustment (S15 Table).
