# Supplementary material for: Leveraging eQTLs to identify individual-level tissue of interest for a complex trait
Source: PubMed Central journal article supplement (PMC8174686; doi:10.1371/journal.pcbi.1008915), 2021-05-21
Supplement: pcbi.1008915.s028.pdf [file pcbi.1008915.s028.pdf]

| Trait                                            | real    |                  |           | shuffled |                  |           | popln<br>mean |
|--------------------------------------------------|---------|------------------|-----------|----------|------------------|-----------|---------------|
|                                                  | AS mean | AS mean sd       | AS P      | MS mean  | MS mean sd       | MS P      |               |
| WHRadjBMI                                        | -0.04   | -0.01(0.018)     | 0         | 0.03     | -0.01(0.018)     | 0         | 0.00          |
| WHR                                              | 0.85    | 0.88(0.017)      | 0         | 0.91     | 0.88(0.017)      | 0         | 0.87          |
| Body mass index                                  | 29.19   | 28.81(0.232)     | 0         | 28.41    | 28.76(0.223)     | 0         | 27.39         |
| Standing height                                  | 166.91  | 167.14(0.152)    | 0         | 167.48   | 167.17(0.15)     | 0         | 168.84        |
| Sitting height                                   | 88.68   | 88.6(0.105)      | 7.55E-117 | 88.53    | 88.62(0.102)     | 2.92E-129 | 89.41         |
| Weight                                           | 81.27   | 80.53(0.513)     | 0         | 79.83    | 80.42(0.488)     | 2.76E-258 | 78.31         |
| Haemoglobin concentration                        | 14.01   | 14.06(0.029)     | 0         | 14.12    | 14.06(0.028)     | 0         | 14.21         |
| Haematocrit percentage                           | 40.67   | 40.78(0.075)     | 0         | 40.96    | 40.78(0.074)     | 0         | 41.16         |
| Red blood cell erythrocyte<br>distribution width | 13.57   | 13.56(0.012)     | 4.15E-198 | 13.56    | 13.55(0.011)     | 2.64E-86  | 13.47         |
| Red blood cell erythrocyte count                 | 4.47    | 4.48(0.007)      | 2.12E-289 | 4.49     | 4.48(0.007)      | 0         | 4.51          |
| High light scatter reticulocyte percentage       | 0.41    | 0.42(0.007)      | 0         | 0.43     | 0.42(0.007)      | 0         | 0.40          |
| White blood cell leukocyte count                 | 6.99    | 7.05(0.058)      | 1.29E-220 | 7.12     | 7.04(0.057)      | 2.30E-300 | 6.89          |
| Immature reticulocyte fraction                   | 0.29    | 0.3(0.001)       | 1.31E-202 | 0.30     | 0.3(0.001)       | 1.62E-205 | 0.29          |
| Neutrophil count                                 | 4.32    | 4.37(0.039)      | 7.42E-258 | 4.41     | 4.36(0.038)      | 7.97E-298 | 4.24          |
| Mean corpuscular haemoglobin<br>concentration    | 34.47   | 34.48(0.014)     | 3.47E-139 | 34.47    | 34.48(0.013)     | 8.32E-125 | 34.54         |
| Monocyte percentage                              | 6.94    | 6.98(0.031)      | 1.34E-285 | 6.98     | 6.99(0.03)       | 3.47E-08  | 7.10          |
| Platelet crit                                    | 0.24    | 0.24(0.001)      | 1.54E-98  | 0.24     | 0.24(0.001)      | 3.98E-12  | 0.23          |
| Lymphocyte count                                 | 1.98    | 1.98(0.017)      | 6.63E-15  | 2.00     | 1.98(0.016)      | 1.18E-259 | 1.95          |
| Platelet count                                   | 256.00  | 257.04(0.987)    | 8.71E-192 | 257.00   | 256.89(0.957)    | 0.001     | 253.21        |
| Number of treatments medications taken           | 2.77    | 2.86(0.068)      | 1.89E-288 | 2.97     | 2.85(0.067)      | 0         | 2.45          |
| Number of self reported non cancer illnesses     | 2.08    | 2.12(0.045)      | 4.48E-154 | 2.15     | 2.11(0.044)      | 1.61E-145 | 1.86          |
| Townsend deprivation index at recruitment        | -1.41   | -1.33(0.06)      | 0         | -1.26    | -1.34(0.059)     | 4.50E-285 | -1.58         |
| Neuroticism score                                | 4.24    | 4.31(0.058)      | 1.24E-223 | 4.35     | 4.3(0.056)       | 7.90E-147 | 4.10          |
| Mean corpuscular haemoglobin                     | 31.43   | 31.46(0.026)     | 0         | 31.50    | 31.47(0.026)     | 4.64E-271 | 31.55         |
| Monocyte count                                   | 0.47    | 0.48(0.004)      | 0         | 0.49     | 0.48(0.005)      | 4.75E-203 | 0.48          |
| Mean corpuscular volume                          | 91.18   | 91.25(0.056)     | 3.11E-257 | 91.38    | 91.26(0.055)     | 0         | 91.34         |
| Mean platelet thrombocyte volume                 | 9.36    | 9.35(0.016)      | 6.32E-226 | 9.33     | 9.35(0.016)      | 5.81E-136 | 9.32          |
| Eosinophil percentage                            | 2.49    | 2.52(0.018)      | 0         | 2.53     | 2.52(0.019)      | 3.38E-49  | 2.56          |
| Creatinine enzymatic in urine                    | 8633.55 | 8672.89(66.169)  | 1.54E-62  | 8618.76  | 8670.39(67.216)  | 4.07E-103 | 8806.64       |
| Waist circumference                              | 90.80   | 92.5(0.98)       | 0         | 94.50    | 92.39(0.981)     | 0         | 90.33         |
| High light scatter reticulocyte count            | 0.02    | 0.02(0)          | 0         | 0.02     | 0.02(0)          | 0         | 0.02          |
| Reticulocyte percentage                          | 1.36    | 1.39(0.019)      | 0         | 1.42     | 1.38(0.019)      | 0         | 1.35          |
| Reticulocyte count                               | 0.06    | 0.06(0.001)      | 0         | 0.06     | 0.06(0.001)      | 0         | 0.06          |
| Basophil count                                   | 0.03    | 0.04(0.001)      | 4.27E-248 | 0.04     | 0.04(0.001)      | 0         | 0.03          |
| Non cancer illness code self reported            | 3071.24 | 2746.71(158.474) | 0         | 2623.36  | 2747.26(158.328) | 5.81E-107 | 2891.68       |
| Non cancer illness year age first occurred       | 689.59  | 655.07(14.516)   | 0         | 631.65   | 655.89(14.155)   | 0         | 702.50        |
| Age completed full time education                | 16.36   | 16.32(0.044)     | 3.26E-150 | 16.25    | 16.33(0.042)     | 0         | 16.45         |

**S20 Table:** Summary of results from the analyses performed to characterize the tissue-specificity of phenotypic characteristics of the individuals assigned to a tissue-specific subtype of WHRadjBMI. Central tendency measures of the artificial tissue-specific mean of a quantitative trait (computed only in the individuals classified into artificial tissue-specific subtype of WHRadjBMI) across 500 artificial tissue-specific subtype groups identified based on 500 sets of artificial tissue-specific eQTLs (obtained by random exchange of eQTLs between the sets of adipose subcutaneous (AS) and muscle skeletal (MS) specific eQTLs) are provided. These quantitative traits were found primarily heterogeneous between at least one of real AS and MS specific subtype groups of individuals and the remaining population (S11 Table). Here AS P denotes the p-value of testing whether the artificial AS tissue-specific trait mean across the artificial AS tissue-specific subtype groups is different from the original AS tissue-specific trait mean. Similarly MS P is defined. The real AS and MS tissue-specific mean and overall population mean of the traits are also provided.
