# Supplementary material for: Leveraging eQTLs to identify individual-level tissue of interest for a complex trait
Source: PubMed Central journal article supplement (PMC8174686; doi:10.1371/journal.pcbi.1008915), 2021-05-21
Supplement: pcbi.1008915.s029.pdf [file pcbi.1008915.s029.pdf]

| Trait                                                                   | real adip mean | permuted adip mean sd | adip P    | real brain mean | permuted brain mean sd | brain P   | popln mean |
|-------------------------------------------------------------------------|----------------|-----------------------|-----------|-----------------|------------------------|-----------|------------|
| Body mass index                                                         | 30.39          | 29.8(2.579)           | 1.01E-09  | 27.60           | 30.08(2.569)           | 1.19E-143 | 27.40      |
| Waist circumference                                                     | 95.50          | 93.33(5.564)          | 4.98E-25  | 89.20           | 93.92(5.526)           | 3.68E-113 | 90.33      |
| Weight                                                                  | 85.20          | 83.11(6.898)          | 8.55E-16  | 77.58           | 83.85(6.867)           | 3.00E-129 | 78.31      |
| Standing height                                                         | 167.45         | 167.2(0.354)          | 2.63E-76  | 167.65          | 167.15(0.358)          | 3.09E-289 | 168.84     |
| Sitting height                                                          | 88.97          | 88.76(0.104)          | 0         | 88.82           | 88.76(0.104)           | 3.62E-41  | 89.41      |
| Haemoglobin concentration                                               | 14.04          | 13.94(0.05)           | 0         | 13.97           | 13.94(0.049)           | 2.55E-76  | 14.21      |
| Haematocrit percentage                                                  | 40.76          | 40.51(0.146)          | 0         | 40.54           | 40.51(0.146)           | 2.05E-06  | 41.16      |
| Red blood cell erythrocyte count                                        | 4.48           | 4.45(0.032)           | 2.04E-179 | 4.44            | 4.45(0.031)            | 2.60E-21  | 4.51       |
| High light scatter reticulocyte percentage                              | 0.44           | 0.43(0.042)           | 1.60E-24  | 0.40            | 0.43(0.042)            | 1.82E-102 | 0.40       |
| Red blood cell erythrocyte distribution width                           | 13.62          | 13.66(0.045)          | 7.23E-120 | 13.56           | 13.67(0.045)           | 0         | 13.47      |
| White blood cell leukocyte count                                        | 7.15           | 7.16(0.174)           | 0.23      | 6.98            | 7.18(0.171)            | 4.52E-212 | 6.89       |
| High light scatter reticulocyte count                                   | 0.02           | 0.02(0.002)           | 1.17E-37  | 0.02            | 0.02(0.002)            | 1.27E-91  | 0.02       |
| Neutrophil count                                                        | 4.45           | 4.48(0.109)           | 1.42E-11  | 4.35            | 4.49(0.106)            | 5.09E-297 | 4.24       |
| Reticulocyte count                                                      | 0.06           | 0.06(0.005)           | 1.36E-71  | 0.06            | 0.06(0.005)            | 4.74E-45  | 0.06       |
| Reticulocyte percentage                                                 | 1.42           | 1.37(0.095)           | 1.56E-59  | 1.32            | 1.37(0.093)            | 1.05E-50  | 1.35       |
| Mean corpuscular haemoglobin concentration                              | 34.46          | 34.42(0.021)          | 0         | 34.48           | 34.41(0.02)            | 0         | 34.54      |
| Platelet crit                                                           | 0.24           | 0.24(0.002)           | 0.6       | 0.23            | 0.24(0.002)            | 6.25E-167 | 0.23       |
| Basophil count                                                          | 0.04           | 0.04(0.001)           | 9.23E-126 | 0.04            | 0.04(0.001)            | 0         | 0.03       |
| Monocyte percentage                                                     | 6.99           | 6.93(0.06)            | 1.89E-181 | 6.97            | 6.92(0.062)            | 2.94E-83  | 7.10       |
| Neutrophil percentage                                                   | 61.67          | 62.08(0.16)           | 0         | 61.67           | 62.09(0.161)           | 0         | 61.14      |
| Mean corpuscular volume                                                 | 91.09          | 91.23(0.347)          | 5.10E-24  | 91.49           | 91.2(0.345)            | 1.78E-108 | 91.34      |
| Platelet count                                                          | 256.95         | 257.38(1.965)         | 5.57E-09  | 255.58          | 257.64(1.987)          | 2.58E-166 | 253.21     |
| Lymphocyte percentage                                                   | 28.20          | 27.88(0.139)          | 0         | 28.25           | 27.87(0.144)           | 0         | 28.63      |
| Monocyte count                                                          | 0.49           | 0.48(0.011)           | 3.15E-47  | 0.47            | 0.48(0.011)            | 1.61E-156 | 0.48       |
| Basophil percentage                                                     | 0.59           | 0.61(0.012)           | 2.86E-240 | 0.60            | 0.61(0.013)            | 1.49E-134 | 0.57       |
| Number of treatments medications taken                                  | 3.08           | 3.03(0.3)             | 8.80E-06  | 2.70            | 3.07(0.301)            | 7.88E-229 | 2.45       |
| Number of self reported non cancer illnesses                            | 2.24           | 2.2(0.192)            | 5.35E-11  | 1.98            | 2.22(0.19)             | 8.09E-234 | 1.87       |
| Interpolated Age of participant when non cancer illness first diagnosed | 41.89          | 41.2(0.503)           | 1.70E-281 | 41.56           | 41.22(0.502)           | 8.36E-71  | 42.32      |
| Townsend deprivation index at recruitment                               | -1.13          | -0.98(0.12)           | 6.98E-266 | -1.26           | -0.96(0.119)           | 0         | -1.58      |
| Neuroticism score                                                       | 4.44           | 4.55(0.065)           | 0         | 4.38            | 4.55(0.067)            | 0         | 4.10       |
| Creatinine enzymatic in urine                                           | 9077.69        | 8794.61(534.421)      | 1.27E-44  | 8429.45         | 8846.33(529.198)       | 1.79E-96  | 8806.93    |
| Sodium in urine                                                         | 79.56          | 77.5(4.269)           | 3.10E-37  | 74.72           | 77.98(4.235)           | 9.31E-92  | 76.21      |
| Immature reticulocyte fraction                                          | 0.30           | 0.3(0.01)             | 6.63E-17  | 0.29            | 0.3(0.009)             | 1.19E-129 | 0.29       |
| Mean corpuscular haemoglobin                                            | 31.39          | 31.4(0.125)           | 0.04      | 31.55           | 31.39(0.126)           | 4.92E-258 | 31.55      |
| Lymphocyte count                                                        | 1.98           | 1.97(0.052)           | 2.20E-18  | 1.93            | 1.97(0.052)            | 8.81E-77  | 1.95       |
| Eosinophil count                                                        | 0.18           | 0.18(0.006)           | 9.52E-07  | 0.17            | 0.18(0.007)            | 1.51E-78  | 0.17       |
| Non cancer illness code self reported                                   | 2405.55        | 2629.07(294.182)      | 6.95E-90  | 2779.19         | 2607.87(286.357)       | 1.98E-56  | 2891.97    |
| Non cancer illness year age first occurred                              | 628.73         | 642.48(62.848)        | 7.07E-09  | 703.82          | 635.71(61.989)         | 8.73E-186 | 702.47     |
| Mean sphered cell volume                                                | 82.86          | 83.21(0.444)          | 5.65E-98  | 83.37           | 83.18(0.444)           | 3.20E-29  | 82.87      |
| Mean reticulocyte volume                                                | 106.00         | 106.24(0.27)          | 7.31E-127 | 106.22          | 106.23(0.263)          | 0.06      | 105.83     |
| Eosinophil percentage                                                   | 2.53           | 2.51(0.04)            | 4.40E-55  | 2.52            | 2.51(0.042)            | 0.003     | 2.56       |
| Platelet distribution width                                             | 16.49          | 16.48(0.013)          | 8.96E-244 | 16.47           | 16.48(0.013)           | 1.06E-54  | 16.49      |
| Potassium in urine                                                      | 63.61          | 62.16(1.764)          | 3.31E-105 | 61.68           | 62.29(1.727)           | 1.30E-20  | 63.47      |
| Birth weight                                                            | 3.30           | 3.29(0.018)           | 3.09E-83  | 3.30            | 3.29(0.018)            | 1.67E-25  | 3.33       |

**S21 Table:** Summary of results on the phenotypic characteristics of the individuals assigned to tissue-specific subtype of BMI identified based on random permutations of the primary phenotype (BMI) across individuals. Central tendency measures of the tissue-specific mean of a quantitative trait (computed only in the individuals classified into tissue-specific subtype detected based on a randomly permuted BMI data) across 500 tissue-specific subtype groups identified based on 500 random permutations of BMI data are provided. These quantitative traits were found primarily heterogeneous between at least one of real adipose and brain specific subtype groups of individuals and the remaining population (S10 Table). Here adipose P denotes the p-value of testing whether a trait mean computed only in the random adipose subtype group of individuals (detected based on random permutations of BMI) is different from the original adipose tissue-specific trait mean. Similarly Brain P is defined. The real adipose and brain tissue-specific mean and overall population mean of the traits are also provided.
