# Supplementary material for: Leveraging eQTLs to identify individual-level tissue of interest for a complex trait
Source: PubMed Central journal article supplement (PMC8174686; doi:10.1371/journal.pcbi.1008915), 2021-05-21
Supplement: pcbi.1008915.s030.pdf [file pcbi.1008915.s030.pdf]

| Trait                                         | real    | permuted         | AS P      | real    | permuted         | MS P      | popln mean |
|-----------------------------------------------|---------|------------------|-----------|---------|------------------|-----------|------------|
|                                               | AS mean | AS mean sd       |           | MS mean | MS mean sd       |           |            |
| WHRadjBMI                                     | -0.04   | 0(0.002)         | 0         | 0.03    | 0(0.002)         | 0         | 0.00       |
| WHR                                           | 0.85    | 0.87(0.003)      | 0         | 0.91    | 0.87(0.002)      | 0         | 0.87       |
| Body mass index                               | 29.19   | 27.39(0.126)     | 0         | 28.41   | 27.38(0.126)     | 0         | 27.39      |
| Standing height                               | 166.91  | 168.83(0.265)    | 0         | 167.48  | 168.84(0.241)    | 0         | 168.84     |
| Sitting height                                | 88.68   | 89.41(0.143)     | 0         | 88.53   | 89.41(0.129)     | 0         | 89.41      |
| Weight                                        | 81.27   | 78.3(0.428)      | 0         | 79.83   | 78.28(0.415)     | 0         | 78.31      |
| Haemoglobin concentration                     | 14.01   | 14.21(0.034)     | 0         | 14.12   | 14.21(0.033)     | 0         | 14.21      |
| Haematocrit percentage                        | 40.67   | 41.15(0.098)     | 0         | 40.96   | 41.15(0.094)     | 0         | 41.16      |
| Red blood cell erythrocyte distribution width | 13.57   | 13.47(0.026)     | 0         | 13.56   | 13.47(0.025)     | 0         | 13.47      |
| Red blood cell erythrocyte count              | 4.47    | 4.51(0.011)      | 0         | 4.49    | 4.51(0.011)      | 0         | 4.51       |
| High light scatter reticulocyte percentage    | 0.41    | 0.4(0.007)       | 0         | 0.43    | 0.4(0.009)       | 0         | 0.40       |
| White blood cell leukocyte count              | 6.99    | 6.89(0.057)      | 0         | 7.12    | 6.88(0.054)      | 0         | 6.89       |
| Immature reticulocyte fraction                | 0.29    | 0.29(0.002)      | 0         | 0.30    | 0.29(0.002)      | 0         | 0.29       |
| Neutrophill count                             | 4.32    | 4.24(0.039)      | 0         | 4.41    | 4.24(0.038)      | 0         | 4.24       |
| Mean corpuscular haemoglobin concentration    | 34.47   | 34.54(0.029)     | 0         | 34.47   | 34.54(0.029)     | 0         | 34.54      |
| Monocyte percentage                           | 6.94    | 7.1(0.073)       | 0         | 6.98    | 7.1(0.073)       | 0         | 7.10       |
| Platelet crit                                 | 0.24    | 0.23(0.001)      | 0         | 0.24    | 0.23(0.001)      | 0         | 0.23       |
| Lymphocyte count                              | 1.98    | 1.95(0.034)      | 3.75E-101 | 2.00    | 1.95(0.031)      | 0         | 1.95       |
| Platelet count                                | 256.00  | 253.25(1.673)    | 0         | 257.00  | 253.16(1.545)    | 0         | 253.21     |
| Number of treatments medications taken        | 2.77    | 2.46(0.066)      | 0         | 2.97    | 2.45(0.071)      | 0         | 2.45       |
| Number of self reported non cancer illnesses  | 2.08    | 1.86(0.047)      | 0         | 2.15    | 1.87(0.05)       | 0         | 1.86       |
| Townsend deprivation index at recruitment     | -1.41   | -1.57(0.081)     | 0         | -1.26   | -1.58(0.074)     | 0         | -1.58      |
| Neuroticism score                             | 4.24    | 4.11(0.099)      | 1.62E-288 | 4.35    | 4.1(0.095)       | 0         | 4.10       |
| Mean corpuscular haemoglobin                  | 31.43   | 31.55(0.05)      | 0         | 31.50   | 31.55(0.049)     | 2.33E-187 | 31.55      |
| Monocyte count                                | 0.47    | 0.48(0.006)      | 8.74E-115 | 0.49    | 0.48(0.006)      | 1.64E-225 | 0.48       |
| Mean corpuscular volume                       | 91.18   | 91.34(0.119)     | 1.68E-247 | 91.38   | 91.35(0.113)     | 7.97E-19  | 91.34      |
| Mean platelet thrombocyte volume              | 9.36    | 9.32(0.029)      | 5.66E-313 | 9.33    | 9.32(0.03)       | 1.90E-17  | 9.32       |
| Eosinophill percentage                        | 2.49    | 2.56(0.049)      | 5.9E-318  | 2.53    | 2.56(0.047)      | 4.76E-39  | 2.56       |
| Creatinine enzymatic in urine                 | 8633.55 | 8797.42(156.859) | 3.61E-168 | 8618.76 | 8808.86(151.926) | 2.52E-240 | 8806.64    |
| Waist circumference                           | 90.80   | 90.32(0.367)     | 1.52E-269 | 94.50   | 90.3(0.355)      | 0         | 90.33      |
| High light scatter reticulocyte count         | 0.02    | 0.02(0)          | 7.67E-277 | 0.02    | 0.02(0)          | 0         | 0.02       |
| Reticulocyte percentage                       | 1.36    | 1.35(0.023)      | 8.63E-42  | 1.42    | 1.35(0.023)      | 0         | 1.35       |
| Reticulocyte count                            | 0.06    | 0.06(0.001)      | 0.006     | 0.06    | 0.06(0.001)      | 0         | 0.06       |
| Basophill count                               | 0.03    | 0.03(0.002)      | 9.45E-88  | 0.04    | 0.03(0.001)      | 0         | 0.03       |
| Non cancer illness code self reported         | 3071.24 | 2887.54(384.658) | 1.35E-36  | 2623.36 | 2869.04(391.165) | 5.20E-62  | 2891.68    |
| Non cancer illness year age first occurred    | 689.59  | 702.72(28.466)   | 2.93E-34  | 631.65  | 702.56(28.388)   | 0         | 702.50     |
| Age completed full time education             | 16.36   | 16.46(0.092)     | 1.10E-155 | 16.25   | 16.44(0.093)     | 0         | 16.45      |

**S22 Table:** Summary of results on the phenotypic characteristics of the individuals assigned to tissue-specific subtype of WHRadjBMI identified based on random permutations of the primary phenotype (WHRadjBMI) across individuals. Central tendency measures of the tissue-specific mean of a quantitative trait (computed only in the individuals classified into a tissue-specific subtype detected based on a randomly permuted WHRadjBMI data) across 500 tissue-specific subtype groups identified based on 500 random permutations of WHRadjBMI data are provided. These quantitative traits were found primarily heterogeneous between at least one of real adipose subcutaneous (AS) and muscle skeletal (MS) specific subtype groups of individuals and the remaining population (S11 Table). Here AS P denotes the p-value of testing whether a trait mean computed only in the random AS-specific subtype group of individuals (detected based on random permutations of WHRadjBMI) is different from the original AS tissue-specific trait mean. Similarly MS P is defined. The real AS and MS tissue-specific mean and overall population mean of the traits are also provided.
