# Supplementary material for: Leveraging eQTLs to identify individual-level tissue of interest for a complex trait
Source: PubMed Central journal article supplement (PMC8174686; doi:10.1371/journal.pcbi.1008915), 2021-05-21
Supplement: pcbi.1008915.s031.pdf [file pcbi.1008915.s031.pdf]

| Trait                                         | P value   | Mean    |         | s.d.     |          |
|-----------------------------------------------|-----------|---------|---------|----------|----------|
|                                               |           | Adipose | Brain   | Adipose  | Brain    |
| Weight                                        | 5.45E-137 | 85.20   | 77.57   | 25.02    | 25.18    |
| Waist circumference                           | 9.36E-137 | 95.51   | 89.20   | 20.25    | 20.57    |
| Body mass index                               | 1.08E-127 | 30.39   | 27.60   | 8.60     | 8.74     |
| High light scatter reticulocyte count         | 2.73E-73  | 0.02    | 0.02    | 0.01     | 0.01     |
| Reticulocyte count                            | 2.63E-68  | 0.06    | 0.06    | 0.04     | 0.05     |
| High light scatter reticulocyte percentage    | 2.25E-66  | 0.44    | 0.40    | 0.25     | 0.27     |
| Reticulocyte percentage                       | 3.34E-60  | 1.42    | 1.32    | 0.84     | 1.05     |
| Immature reticulocyte fraction                | 1.75E-37  | 0.30    | 0.29    | 0.07     | 0.07     |
| Number of self reported non cancer illnesses  | 1.47E-26  | 2.25    | 1.98    | 2.15     | 2.02     |
| Number of treatments medications taken        | 2.65E-26  | 3.08    | 2.70    | 3.16     | 2.96     |
| Creatinine enzymatic in urine                 | 2.87E-22  | 9075.79 | 8432.19 | 5935.93  | 5815.15  |
| Red blood cell erythrocyte count              | 2.67E-18  | 4.48    | 4.44    | 0.41     | 0.41     |
| Sodium in urine                               | 5.76E-18  | 79.58   | 74.73   | 45.87    | 44.42    |
| White blood cell leukocyte count              | 1.34E-15  | 7.15    | 6.98    | 1.96     | 2.01     |
| Non cancer illness code self reported         | 2.89E-14  | 2404.66 | 2779.67 | 10879.75 | 12369.88 |
| Mean sphered cell volume                      | 3.46E-14  | 82.85   | 83.37   | 5.55     | 5.59     |
| Mean corpuscular volume                       | 1.48E-13  | 91.09   | 91.49   | 4.77     | 4.65     |
| Mean corpuscular haemoglobin                  | 9.72E-13  | 31.39   | 31.55   | 1.93     | 2.03     |
| Neutrophil count                              | 9.35E-11  | 4.45    | 4.35    | 1.52     | 1.52     |
| Lymphocyte count                              | 5.73E-10  | 1.98    | 1.93    | 0.76     | 0.71     |
| Monocyte count                                | 2.10E-09  | 0.49    | 0.47    | 0.24     | 0.20     |
| Haematocrit percentage                        | 1.86E-08  | 40.77   | 40.54   | 3.53     | 3.44     |
| Potassium in urine                            | 4.56E-08  | 63.59   | 61.69   | 33.46    | 33.87    |
| Haemoglobin concentration                     | 8.49E-08  | 14.04   | 13.97   | 1.23     | 1.19     |
| Eosinophil count                              | 6.61E-07  | 0.18    | 0.17    | 0.13     | 0.14     |
| Red blood cell erythrocyte distribution width | 1.01E-06  | 13.62   | 13.56   | 1.07     | 1.03     |
| Townsend deprivation index at recruitment     | 0.0003    | -1.13   | -1.26   | 3.12     | 3.12     |

**S23 Table:** Quantitative traits among 106 phenotypes in UK Biobank which are differentially distributed between the adipose-specific subtype group of individuals for BMI and brain-specific subtype group of individuals. We provide the p-values of testing heterogeneity of each trait between the tissue-specific subtype groups. For each trait, the tissue-specific (adipose and brain) mean and standard deviation which are calculated only in the individuals classified as the corresponding tissue-specific subtype of BMI are provided.
